# Supplementary material for: ZnO anchored graphene hydrophobic nanocomposite-based bulk heterojunction solar cells showing enhanced short-circuit current
Source: Royal Society of Chemistry journal article supplement (doi:10.1039/c4tc01056f), 2014-01-01
Supplement: c4tc01056f1.pdf [file c4tc01056f1.pdf]

## ZnO anchored Graphene hydrophobic nanocomposite based bulk hetero-junction solar cells showing enhanced short circuit current.

Rajni Sharma<sup>1</sup>, Firoz Alam<sup>2</sup>, A. K. Sharma<sup>3</sup>, V.Dutta<sup>2</sup>, S.K.Dhawan<sup>1</sup>

<sup>1</sup> CSIR-National Physical Laboratory, Dr. K. S. Krishnan Marg, New Delhi-110012, India

<sup>2</sup>Photovoltaic Laboratory, Centre for Energy Studies, Indian Institute of Technology Delhi, Hauz Khas, New Delhi 110016, India.

<sup>3</sup> National Centre for Photovoltaic Research and Education (NCPRE), Dept. of Electrical Engineering, IIT-Bombay, Powai, Mumbai-470006, India

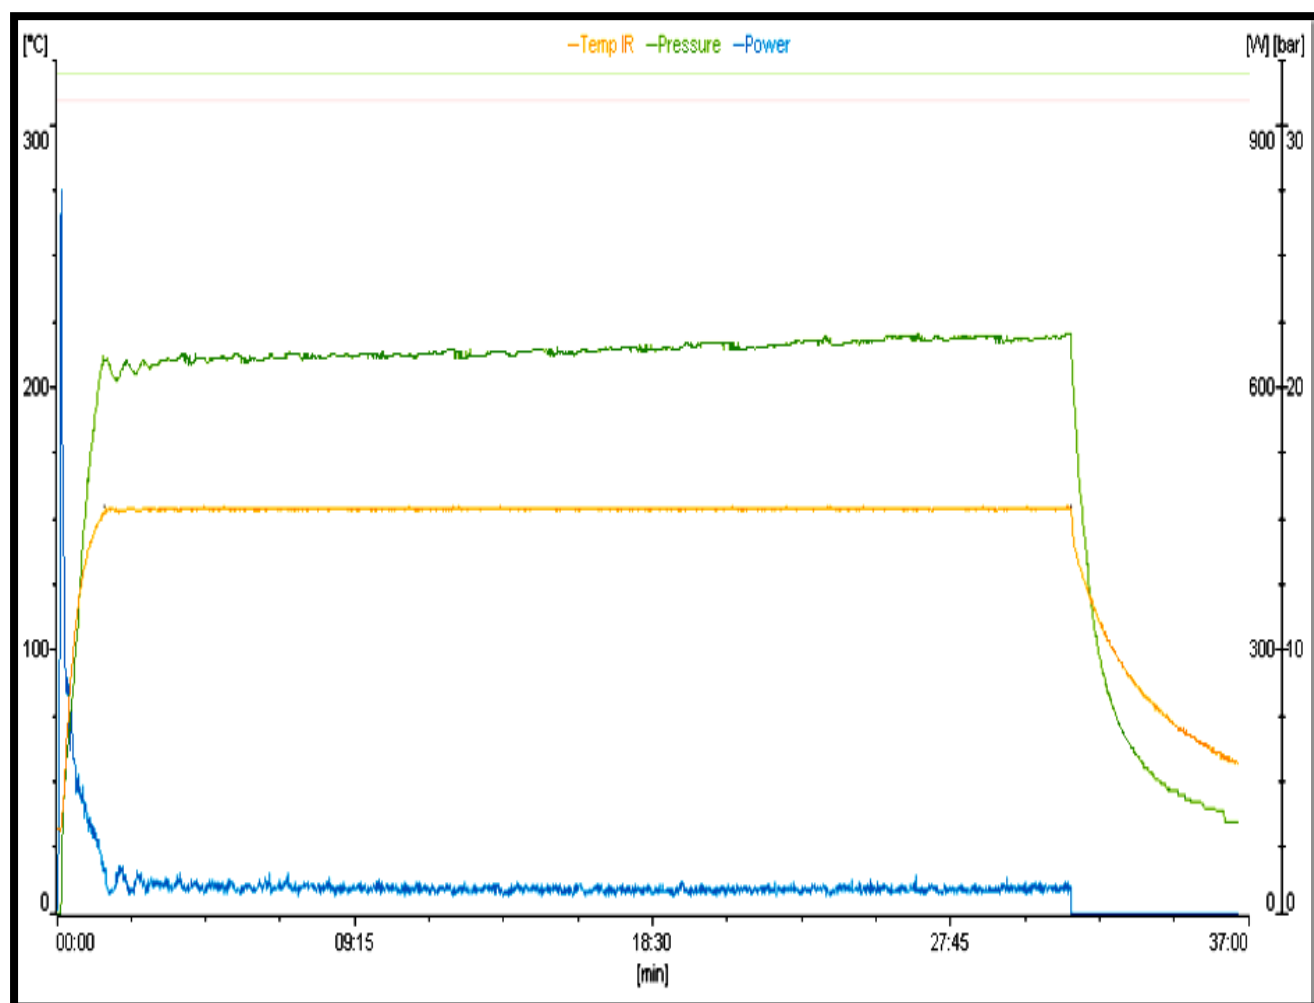

S1 : Graph showing variation of Temperature, Pressure and Power during microwave assisted hydrothermal reaction for ZnO nanoparticles synthesis.

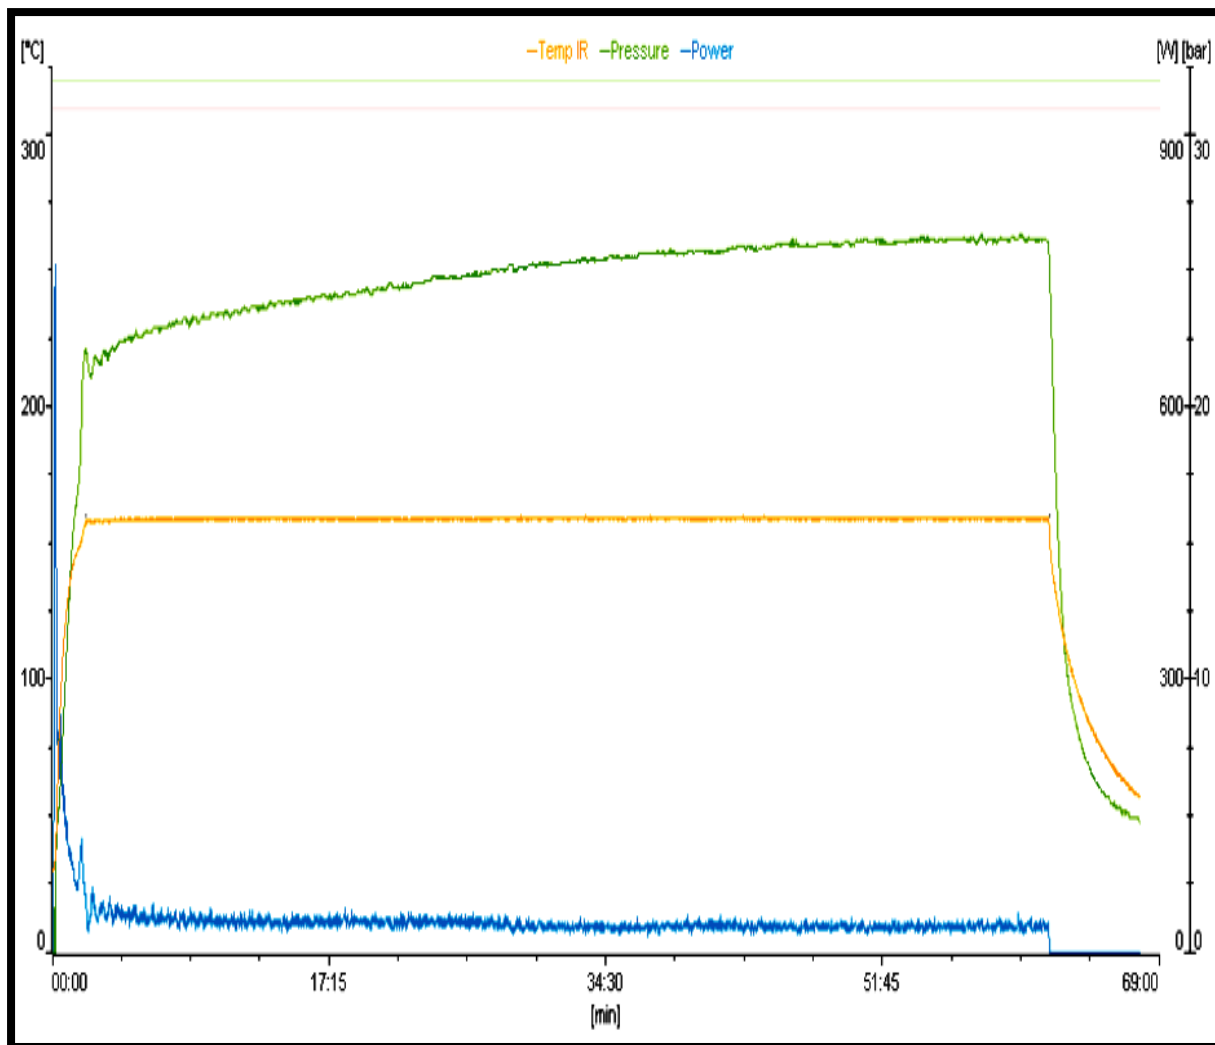

**S2 : Graph showing variation of Temperature, Pressure and Power during microwave assisted hydrothermal reaction for ZnO decorated graphene nanocomposite.**

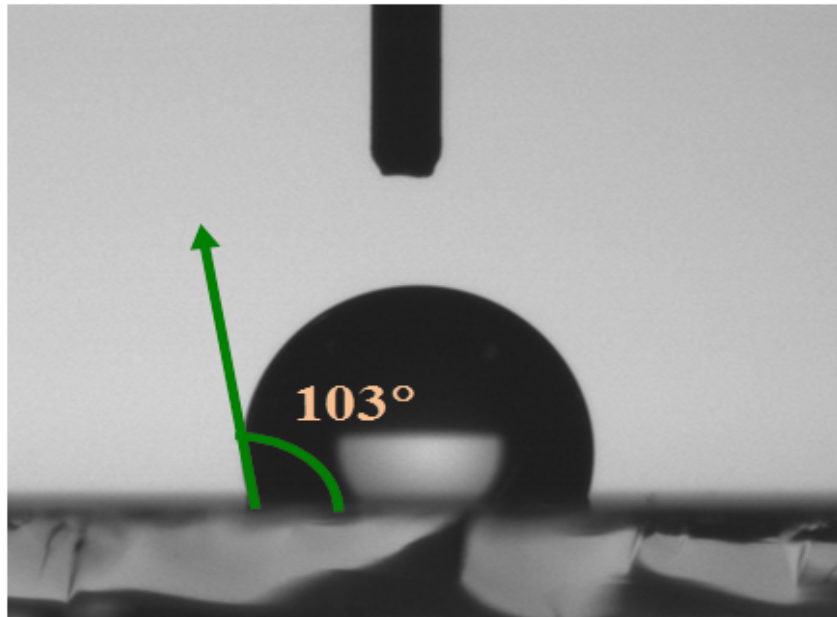

**S3 : Contact angle measurement of hydrothermally synthesized ZnO nanoparticles. Contact angle greater than  $90^\circ$  clearly shows hydrophobic nature of synthesized nanoparticles (as  $\theta < 90^\circ$  is hydrophilic whereas  $\theta > 90^\circ$  is hydrophobic)**

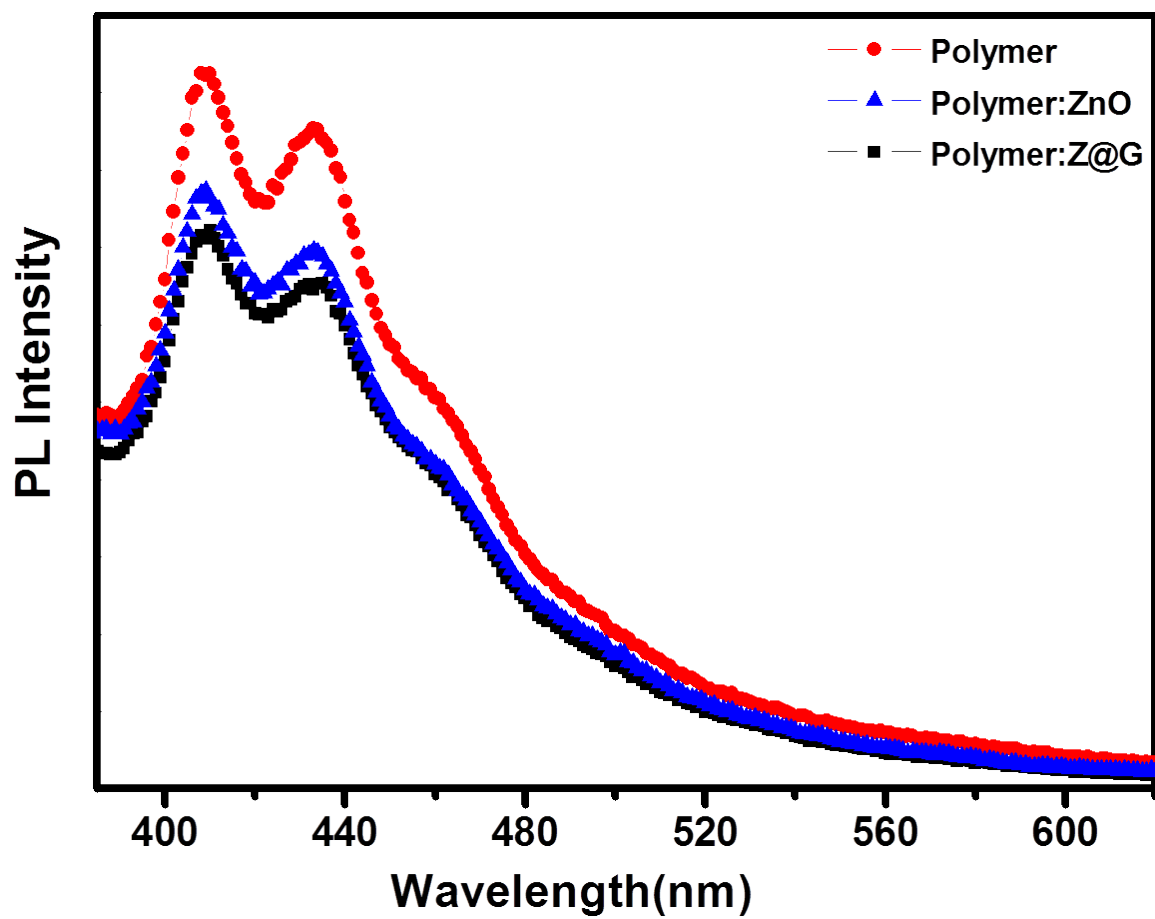

S4 : PL quenching on addition of ZnO nanoparticles and Z@G nanocomposite to the polymer.

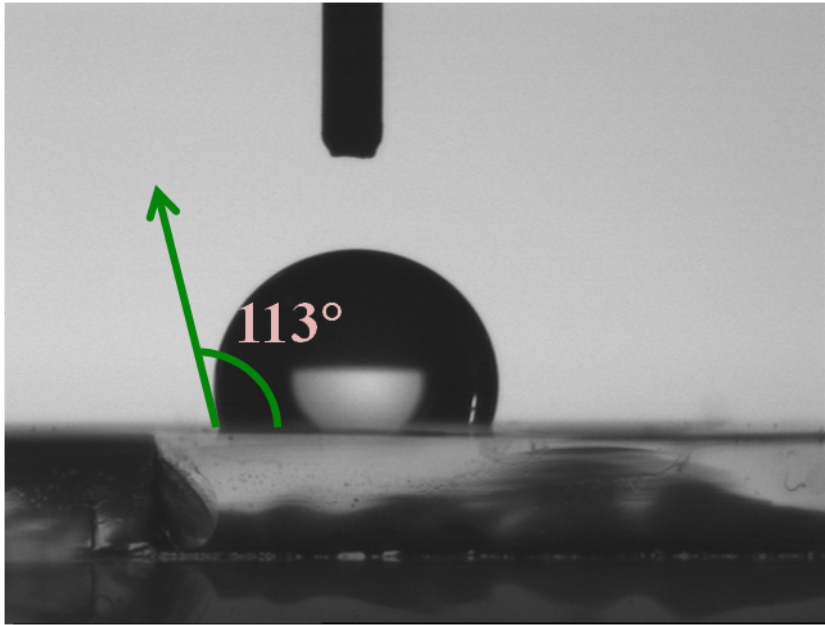

**S5 : Contact angle measurement of hydrothermally synthesized Z@G nanocomposite. Contact angle greater than  $90^\circ$  clearly shows hydrophobic nature of synthesized nanoparticles (as  $\theta < 90^\circ$  is hydrophilic whereas  $\theta > 90^\circ$  is hydrophobic)**

**Table S6** : Crystallographic data of ZnO nanoparticles, Z@G nanocomposite and RGO representing interplanar spacing (d-value), miller indices (hkl), 2 $\theta$  value and average crystallite size.

| Materials | 2 $\theta$<br>(degree) | (hkl) | d (Å) | Average particle<br>size (nm) |
|-----------|------------------------|-------|-------|-------------------------------|
| ZnO       | 31.9                   | (100) | 2.8   | 4.5                           |
|           | 34.58                  | (002) | 2.6   |                               |
|           | 36.4                   | (101) | 2.47  |                               |
|           | 47.6                   | (102) | 1.9   |                               |
|           | 56.7                   | (110) | 1.6   |                               |
|           | 63.1                   | (103) | 1.47  |                               |
|           | 68.09                  | (112) | 1.39  |                               |
|           | 72.4                   | (004) | 1.31  |                               |
|           | 76.7                   | (202) | 1.2   |                               |
| Z@G       | 31.8                   | (100) | 2.8   | 8.0                           |
|           | 34.4                   | (002) | 2.6   |                               |
|           | 36.2                   | (101) | 2.5   |                               |
|           | 47.5                   | (102) | 1.9   |                               |
|           | 56.5                   | (110) | 1.6   |                               |
|           | 62.8                   | (103) | 1.5   |                               |
|           | 67.9                   | (112) | 1.4   |                               |
|           | 72.4                   | (004) | 1.3   |                               |
|           | 76.8                   | (202) | 1.2   |                               |
| RGO       | 29.4                   | (002) | 3.1   | 5.4                           |
